# Supplementary material for: Deep learning enables automated volumetric assessments of cardiac function in zebrafish
Source: PubMed Central journal article supplement (PMC6826023; doi:10.1242/dmm.040188), 2019-10-01
Supplement: dmm-12-040188-s1.pdf [file dmm-12-040188-s1.pdf]

## SUPPLEMENTARY INFORMATION

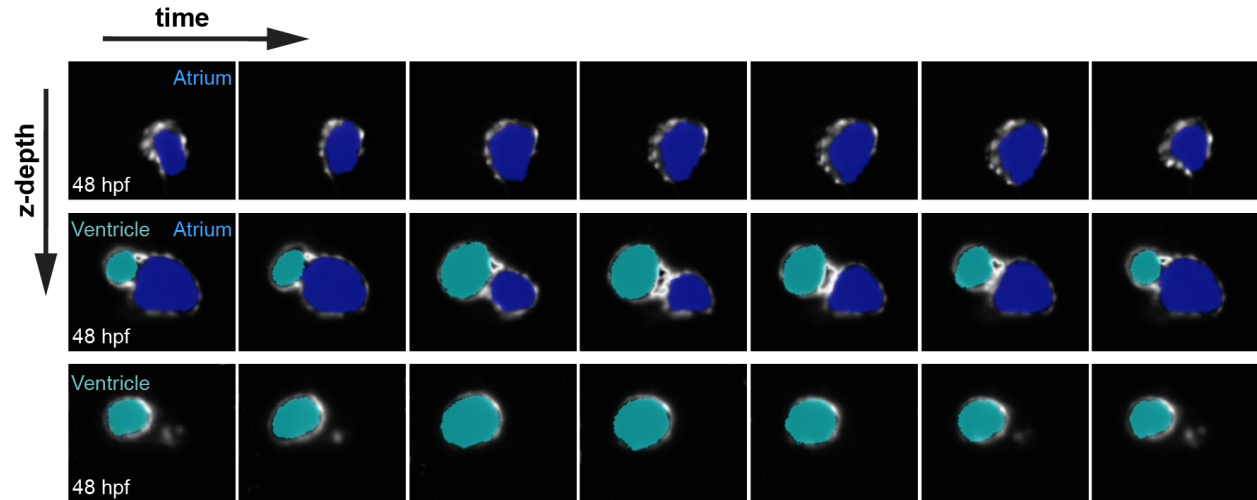

**Figure S1: CFIN chamber classifications at distinct z-depths.**

CFIN-generated chamber labels over a single cardiac cycle at three representative z-depths displaying only atrium, atrium and ventricle, or only ventricle.

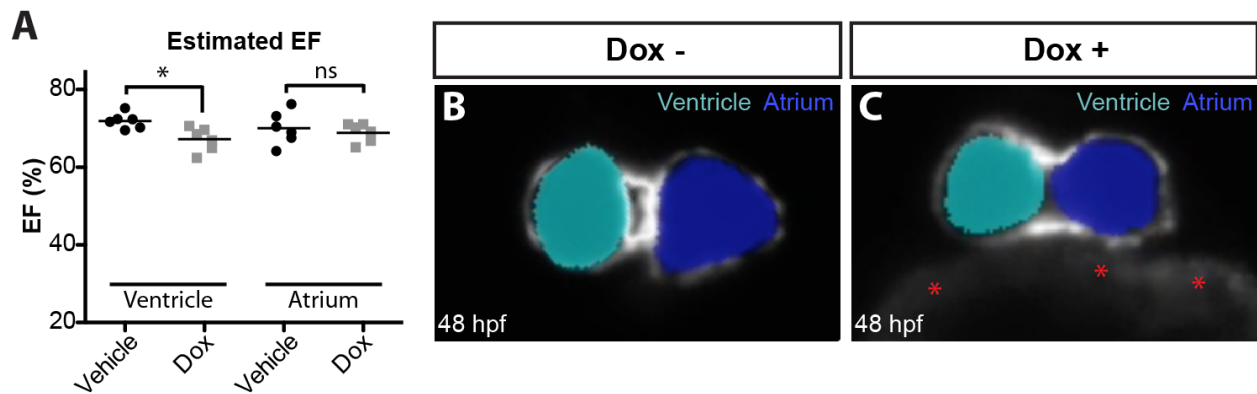

**Figure S2: Estimated EF and Dox-induced autofluorescence.**

(A) Estimated ejection fraction values of Dox treated embryos and controls using chamber radius measurements and the assumption of spherical chambers. (B-C) CFIN labels in untreated embryos (B) compared with Dox treated (C) in the presence of Dox autofluorescence in the yolk (red asterisks).

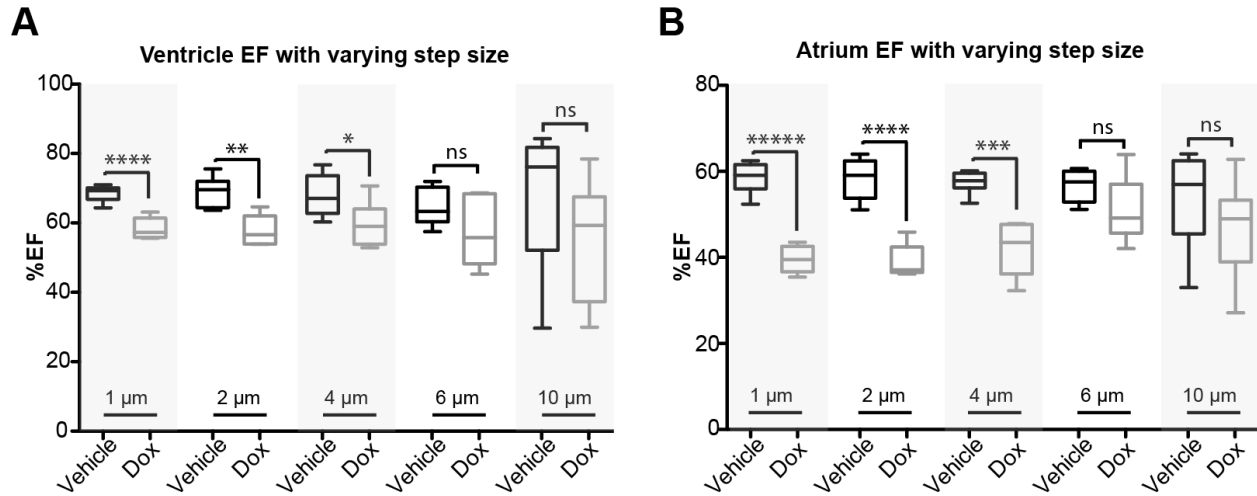

**Figure S3: The effects of increased step size on volume resolution. (A-B)** Ventricular (A) and Atrial (B) EF measurements produced by CFIN using input datasets with increasing z-depth step sizes. Significance denoted as \*\*\*\*\* $p < 10^{-5}$ , \*\*\*\* $p < 10^{-4}$ , \*\*\* $p < 10^{-3}$ , \*\* $p < 10^{-2}$ , \* $p < 0.01$ , or ns (not significant  $p > 0.05$ ) as determined by the students two tailed t-test.

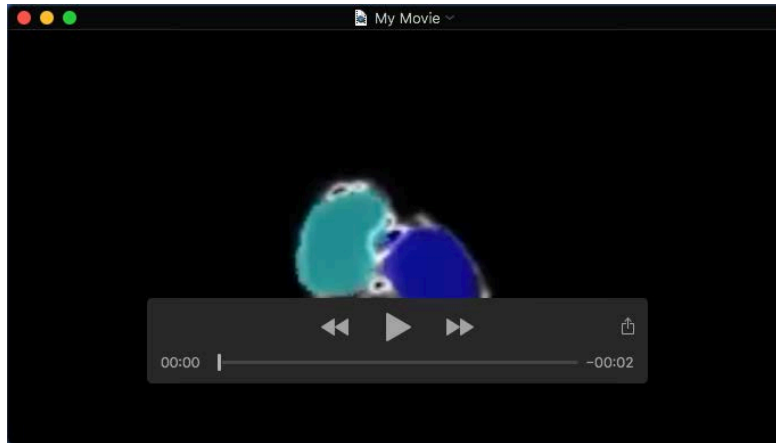

**Movie 1: CFIN validation at a single z-depth**

Dynamic image from a single z-depth with CFIN chamber annotations overlaid.

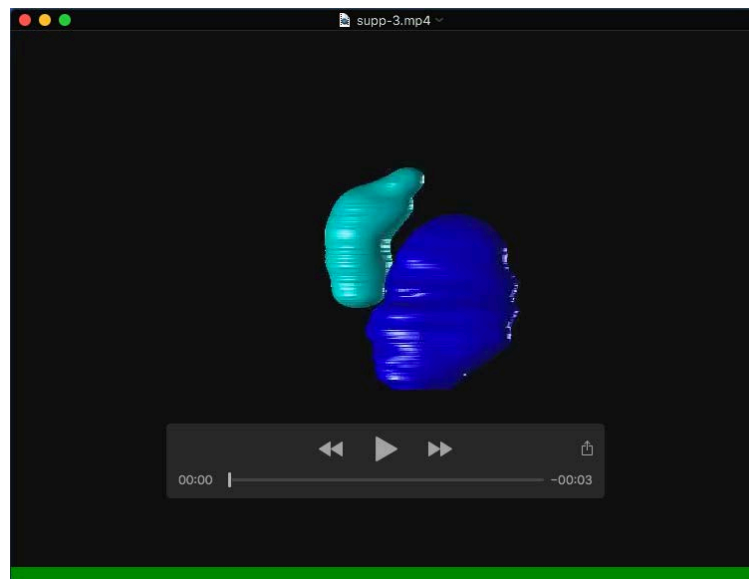

**Movie 2: Volumetric 4D reconstruction from CFIN analysis**

4D graphical reconstruction generated with a synchronized dataset analyzed by CFIN.

**CFIN\_final.mat**

This file contains the trained network for image segmentation of embryonic zebrafish hearts.  
(To be opened in MATLAB.)

**CFIN\_Code.m**

This file contains the MATLAB code for volumetric analysis of segmented images.
